# Supplementary material for: Single point single-cell nanoparticle mediated pulsed laser optoporation
Source: Royal Society of Chemistry journal article supplement (doi:10.1039/c9an01869g), 2019-10-31
Supplement: c9an01869g1.pdf [file c9an01869g1.pdf]

## Electronic Supplementary Information

### Single point single-cell nanoparticle mediated pulsed laser optoporation.

Sergiy Patskovsky , Qi Mengjiao, and Michel Meunier

Laser Processing and Plasmonics Laboratory, Department of Engineering Physics, Polytechnique Montréal, C.P. 6079, Succursale Centre-ville, Montreal, QC, H3C 3A7, Canada

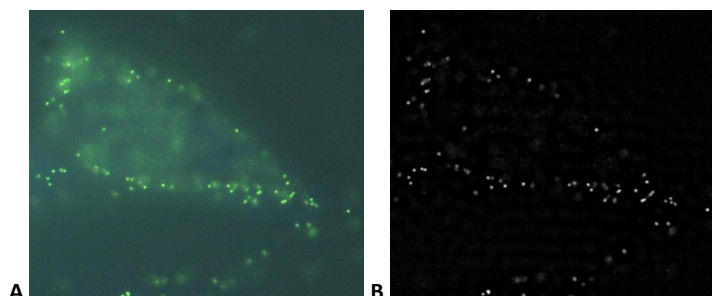

Video S1. A) Experimental 50nm step z-scan images of cell-NPs complex using RLM. B) Image after deconvolution

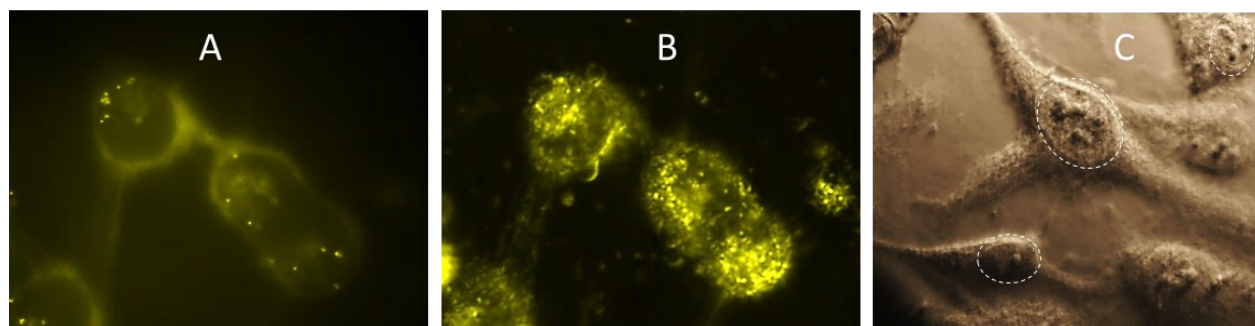

Fig.S1. Comparison of RLM (A) and dark-field microscopy (B) of cell-NPs complex. (C) Nucleus position estimation (red circle) by using oblique illumination microscopy.

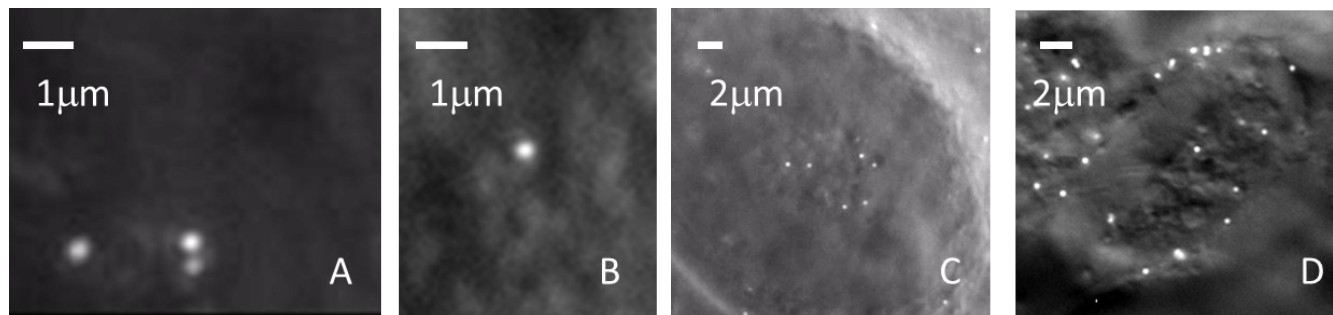

Video S2. NP-mediated laser perforation dependence on the laser power. Low energy 200 mJ/cm<sup>2</sup>: (A) NPs are displaced aside. (B) NPs are “sinking” producing local perforation. (C) Optoporation at energies 300 mJ/cm<sup>2</sup> – 1.5 J/cm<sup>2</sup>. (D) Cell destruction by high energy > 1.5 mJ/cm<sup>2</sup> laser.
